# Supplementary material for: Comparison of Long-Term Postoperative Outcomes of the Subtypes of Chronic Rhinosinusitis with Nasal Polyps
Source: MDPI journal article supplement (doi:10.3390/jcm13061699), 2024-03-15

**Figure S1.** The mean SNOT-22 score of the patients with CRSwNP according to the year after surgery (Domain). SNOT-22, Sinonasal Outcome Test, NECRSwNP, non-eosinophilic subtype of chronic rhinosinusitis with nasal polyps; ECRSwNP, eosinophilic subtype of chronic rhinosinusitis with nasal polyps

\*,  $P \leq 0.05$

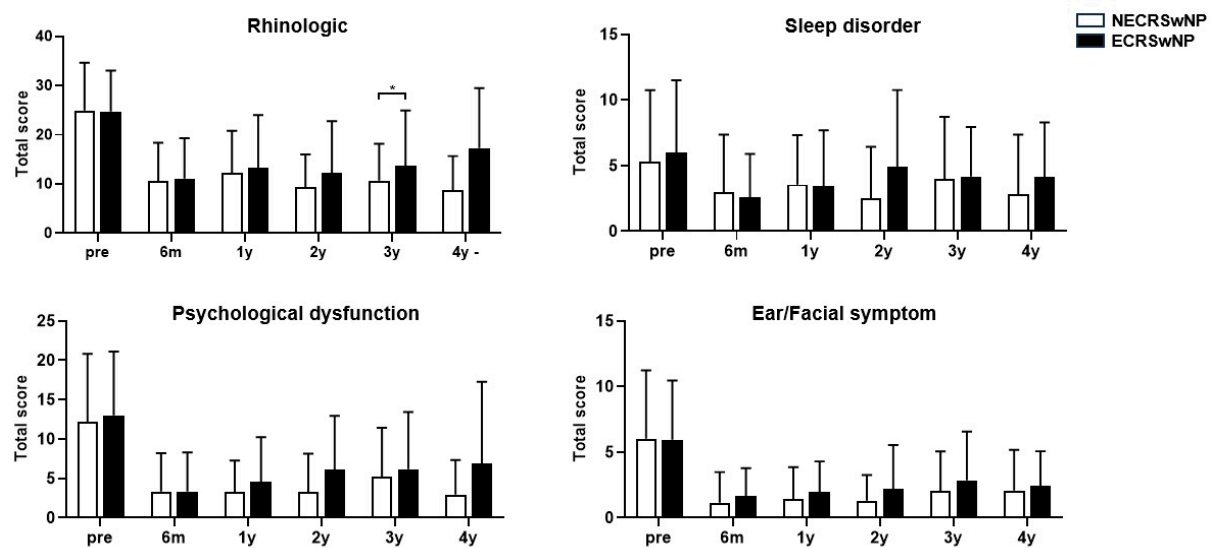

Supplement: s1 [file s1]
